# Supplementary material for: PTPROt aggravates inflammation by enhancing NF-κB activation in liver macrophages during nonalcoholic steatohepatitis
Source: PubMed Central journal article supplement (PMC7196286; doi:10.7150/thno.42658), 2020-04-06
Supplement: thnov10p5290s1.pdf [file thnov10p5290s1.pdf]

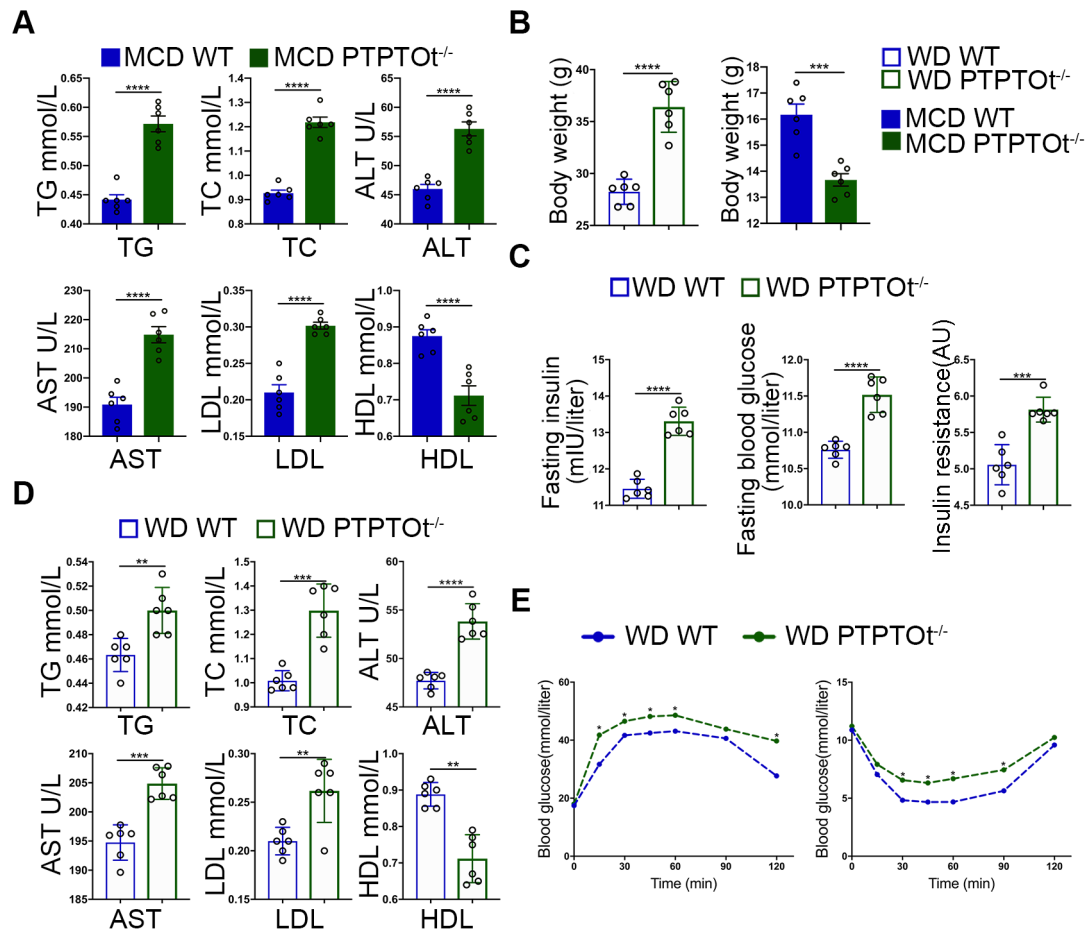

**Figure S1**

A. Statistical analysis of TG, TC, ALT, AST, LDL, and HDL in serum extracts from the mice described in **Figure 1B**.

B. Statistical analysis of body weight from the mice described in **Figure 1A, B**.

C. Statistical analysis of fasting insulin, fasting blood glucose, and insulin resistance from the mice described in **Figure 1A**.

D. Statistical analysis of TG, TC, ALT, AST, LDL, and HDL in serum extracts from the mice described in **Figure 1A**.

E. Glucose tolerance test (GTT) and insulin tolerance test (ITT) of mice described in **Figure 1A**.

Abbreviations: ALT: Alanine aminotransferase; AST: Alanine aminotransferase; DAPI: 4',6-diamidino-2-phenylindole; GTT: Glucose Tolerance Test; HDL: High Density Lipoprotein; ITT: Insulin Tolerance Test; LDL: Low Density Lipoprotein; NASH: nonalcoholic steatohepatitis; TC: Total cholesterol; TG: Triglyceride;

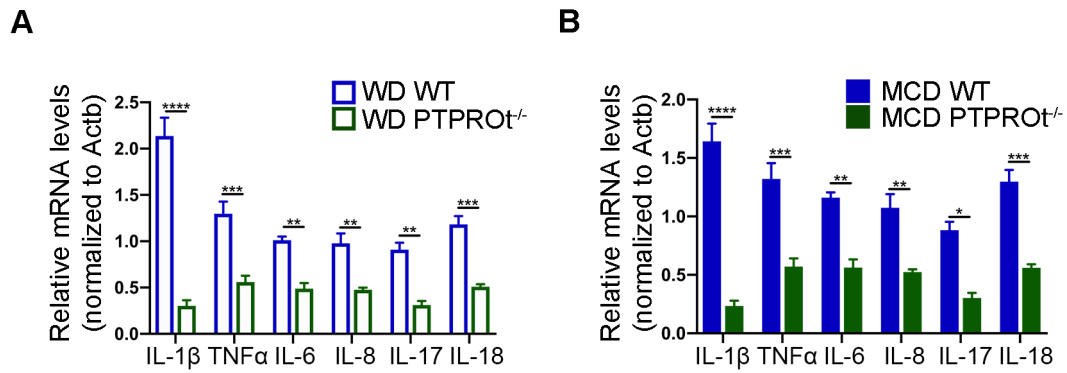

### Figure S2

A. RT-qPCR results showing the mRNA levels of IL-1 $\beta$ , TNF $\alpha$ , IL-6, IL-8, IL-17, and IL-18 in liver macrophages isolated from the livers of mice described in **Figure 1A**.

B. RT-qPCR results showing the mRNA levels of IL-1 $\beta$ , TNF $\alpha$ , IL-6, IL-8, IL-17, and IL-18 in liver macrophages isolated from the livers of mice described in **Figure 1B**.

Abbreviations: MCD: Methionine-choline-deficient; WD: Western diet;

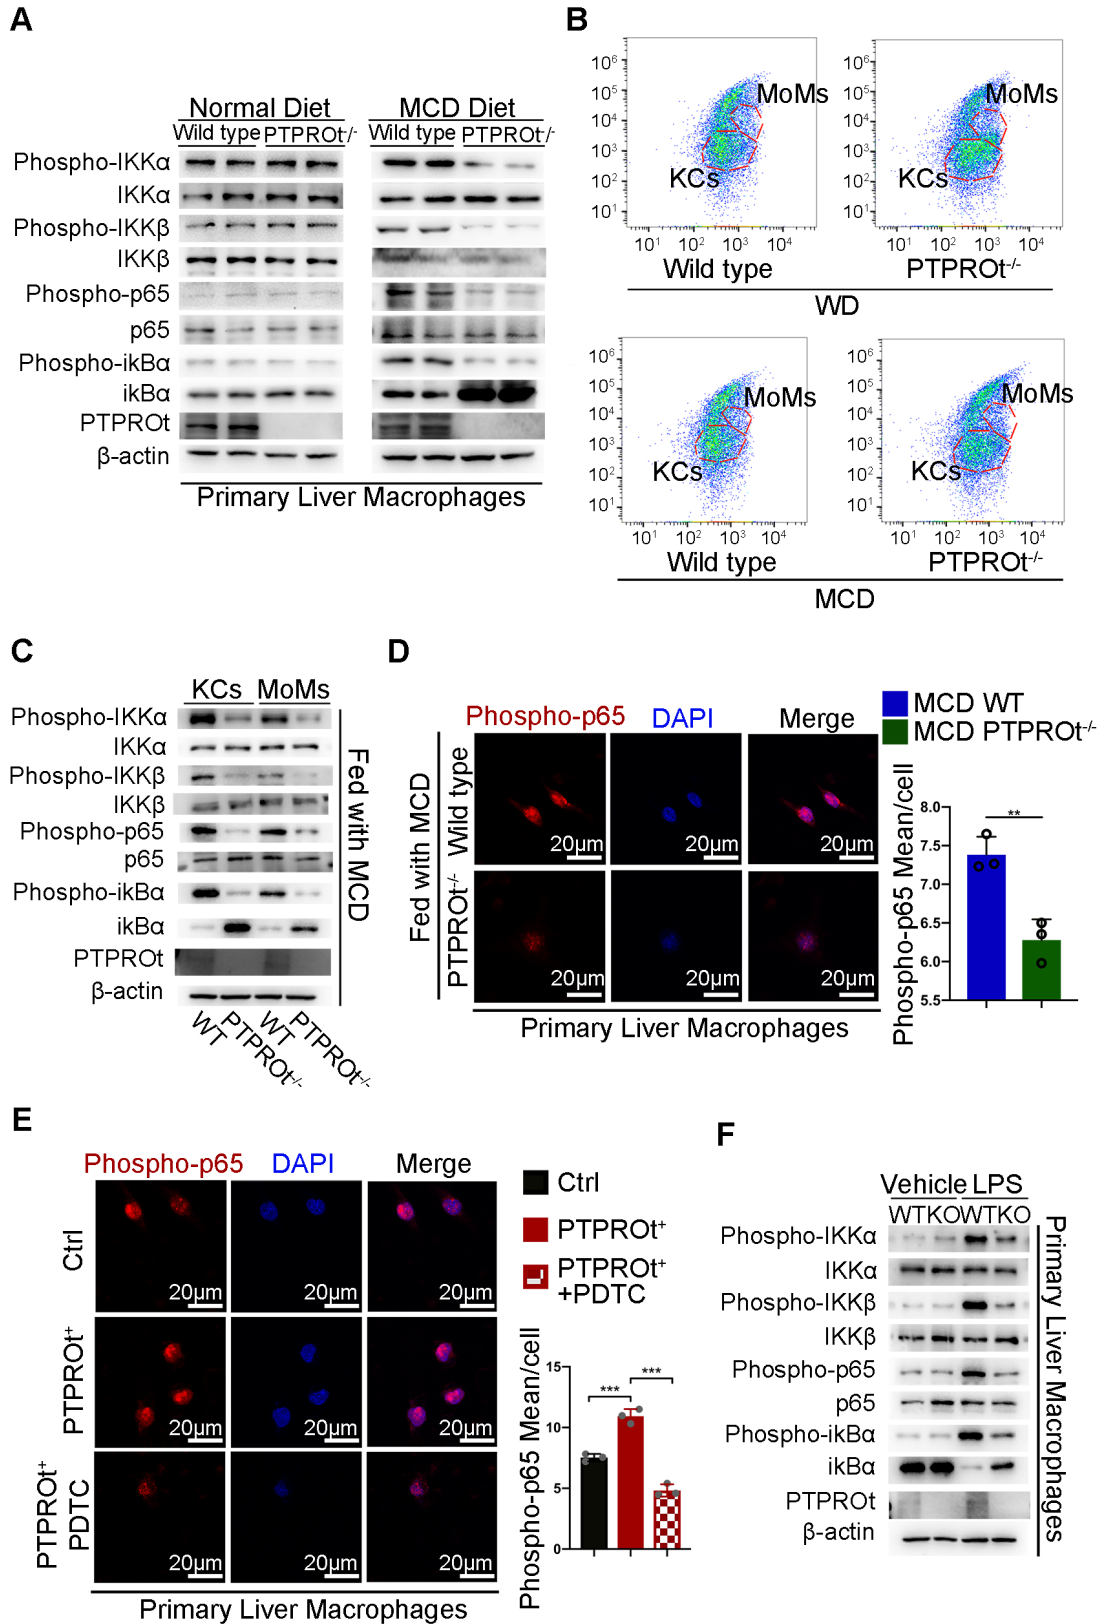

**Figure S3**

**A.** Immunoblotting of phospho-IKKα, IKKα, phospho-IKKβ, IKKβ, phospho-P65,

P65, phospho-ikB $\alpha$ , ikB $\alpha$ , PTPROt, and  $\beta$ -actin (loading control) in primary WT and PTPROt<sup>-/-</sup> liver macrophages that were isolated from the MCD-induced NASH model.

**B.** FACs analysis of monocyte-derived macrophages (MoMs) (defined as F4/80<sup>+</sup>CD11b<sup>hi</sup>Ly6c<sup>int</sup>) and liver-resident Kupffer cells (KCs) (defined as F4/80<sup>+</sup>CD11b<sup>lo</sup>Ly6c<sup>lo</sup>) from WD-induced and MCD-induced NASH model described in **Figure 1A**.

**C.** Immunoblotting of phospho-IKK $\alpha$ , IKK $\alpha$ , phospho-IKK $\beta$ , IKK $\beta$ , phospho-P65, P65, phospho-ikB $\alpha$ , ikB $\alpha$ , PTPROt, and  $\beta$ -actin (loading control) in primary WT/ PTPROt<sup>-/-</sup> monocyte-derived macrophages and Kupffer cells that were isolated from MCD-induced and WD-induced NASH model described in **Figure 1A**.

**D.** Fluorescence microscopy of phospho-P65 in primary WT and PTPROt<sup>-/-</sup> liver macrophages isolated from the mice described in MCD-induced NASH model. DAPI, DNA-binding dye. Bar = 20  $\mu$ m. Quantification of phospho-P65 per cell was shown.

**E.** Fluorescence microscopy of phospho-p65 in RAW-Ctrl and RAW-PTPROt<sup>+</sup> cells treated with free fatty acids (FFAs), with or without pyrrolidine dithiocarbamate (PDTC) for 24 hr. DAPI, DNA-binding dye. Bar = 20  $\mu$ m. Quantification of phospho-P65 per cell was shown.

**F.** Immunoblotting of phospho-IKK $\alpha$ , IKK $\alpha$ , phospho-IKK $\beta$ , IKK $\beta$ , phospho-P65, P65, phospho-ikB $\alpha$ , ikB $\alpha$ , PTPROt, and  $\beta$ -actin (loading control) in primary WT and PTPROt<sup>-/-</sup> liver macrophages treated with Vehicle/LPS.

Abbreviations: FFAs: Free Fatty Acids; KCs: Kupffer cells; MCD: Methionine-choline-deficient; LPS: Lipopolysaccharide; MoMs: monocyte-derived macrophages; PDTC: pyrrolidine dithiocarbamate; WD: Western diet;

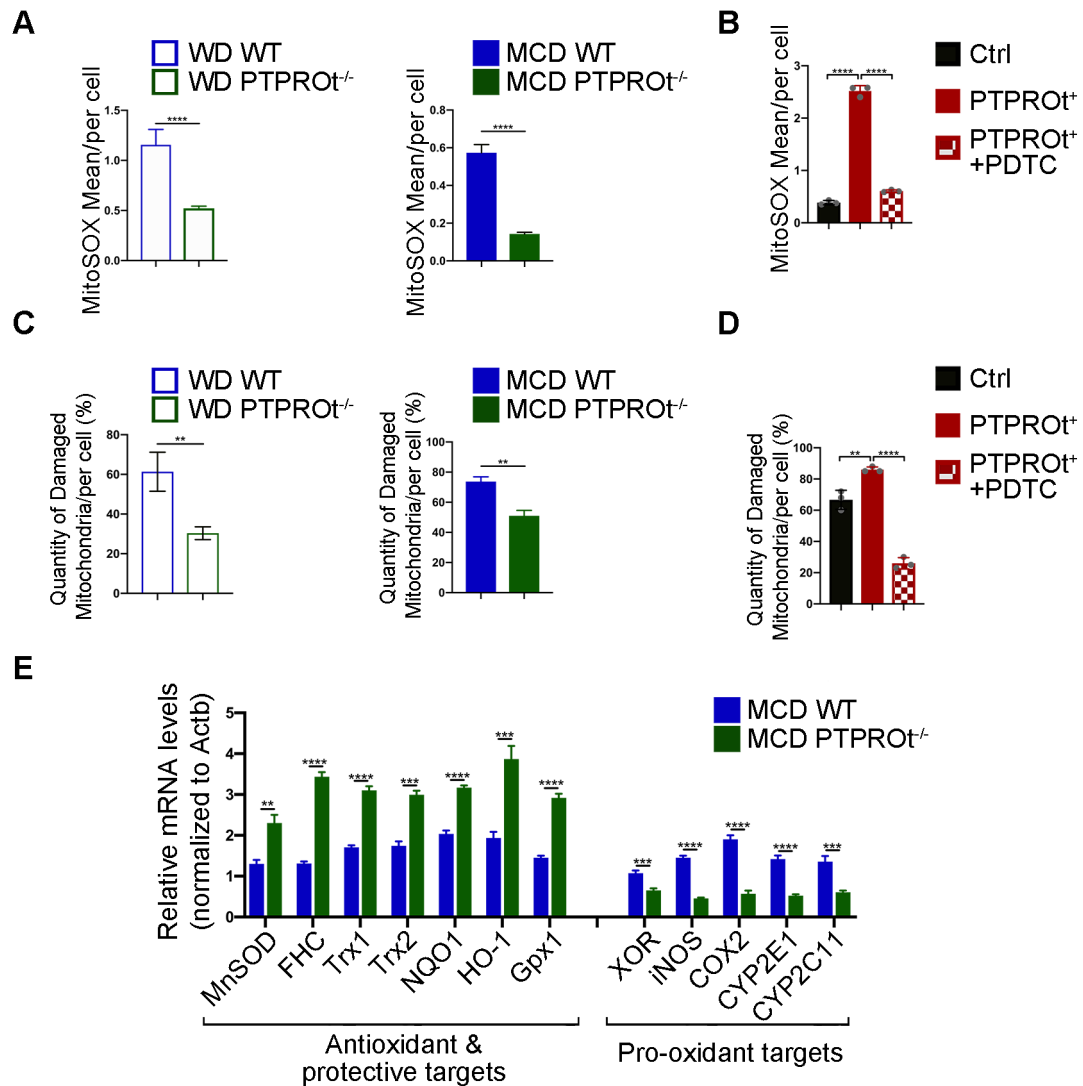

**Figure S4**

A. Corresponding to **Figure 3A**, statistical analysis of ROS levels in the liver macrophages of livers from the mice described in **Figure 1A, B**.

B. Corresponding to **Figure 3B**, statistical analysis of ROS level of RAW-Ctrl and RAW-PTPROT<sup>+</sup> cells treated with FFAs, with or without pyrrolidine dithiocarbamate (PDTC) for 24 hr.

C. Corresponding to **Figure 3C**, the number of damaged mitochondria is shown.

D. Corresponding to **Figure 3D**, the number of damaged mitochondria is shown.

E. RT-PCR results showing the relative mRNA levels of antioxidant & protective targets (MnSOD, FHC, Trx1, Trx2, NQO1, HO-1 and Gpx1) and

pro-oxidant targets (XOR, iNOS, COX2, CYP2E1, and CYP2C11) in primary liver macrophages from mice described in **Figure 1B**.

Abbreviations: MCD: Methionine-choline-deficient; WD: Western diet; PDTC: pyrrolidine dithiocarbamate;

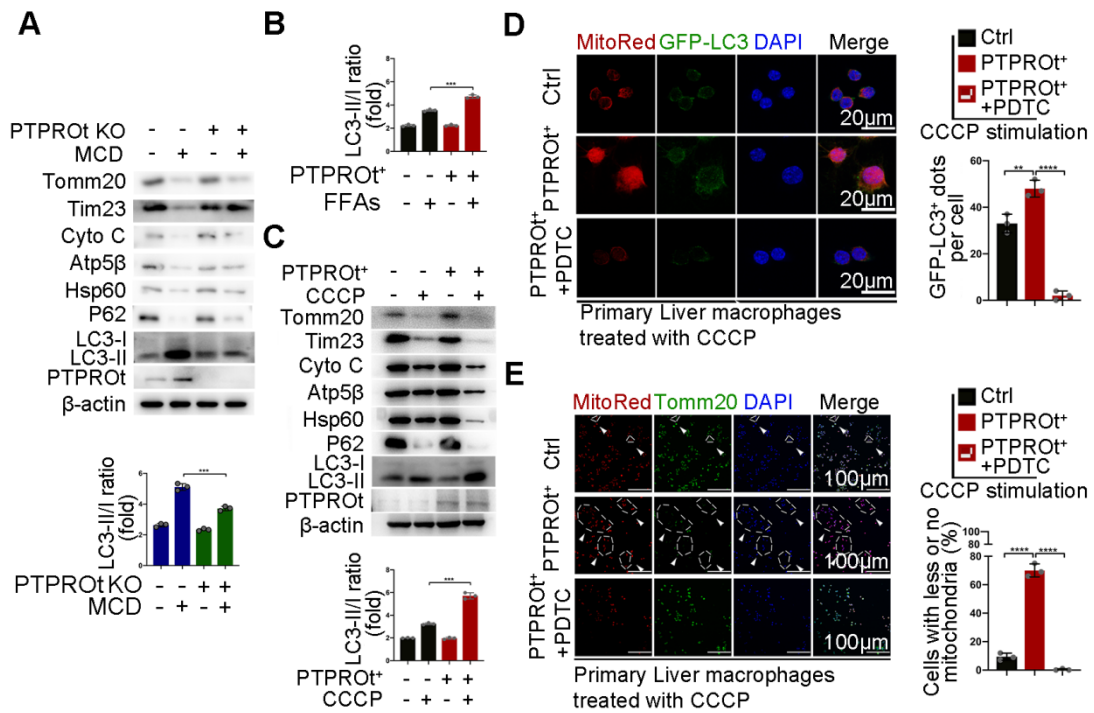

**Figure S5**

A. Immunoblotting of Tomm20, Tim23, Cyto C, Atp5β, Hsp60, P62, LC3I, LC3II, PTPROT, and β-actin (loading control) in primary liver macrophages isolated from the mice described in **Figure 1A**. LC3II/LC3I ratios were quantified using ImageJ software.

B. After densitometric analysis of blots corresponding to all samples in **Figure 5D**, LC3II/LC3I ratios were quantified using ImageJ software.

C. Immunoblotting of Tomm20, Tim23, Cyto C, Atp5β, Hsp60, P62, LC3I, LC3II, PTPROT, and β-actin (loading control) in RAW-Ctrl and RAW-PTPROt<sup>+</sup> cells treated with CCCP for 2 hr. LC3II/LC3I ratios were quantified using ImageJ software.

D. Fluorescence microscopy showing co-localization of GFP-LC3 with mitochondria [identified with the mitochondrial stain MitoTracker Deep Red

(Mito-Red)] in RAW-Ctrl and RAW-PTPROt<sup>+</sup> cells treated with CCCP, with or without PDTC for 2 hr. Quantification of GFP-LC3 puncta co-localized with mitochondria per cell was shown.

E. Fluorescence microscopy showing co-localization of anti-Tomm20 with mitochondria [identified with the mitochondrial stain MitoTracker Deep Red (Mito-Red)] in RAW-Ctrl and RAW-PTPROt<sup>+</sup> cells treated with CCCP, with or without pyrrolidine dithiocarbamate (PDTC) for 2 hr. The arrows indicate the cells staining with MitoRed<sup>+</sup> and Anti-Tomm20<sup>-</sup>. Frequency of cells with few or no mitochondria was shown.

Abbreviations: CCCP: Carbonyl cyanide m-chlorophenylhydrazine; Cyto C: Cytochrome C; DAPI: 4',6-diamidino-2-phenylindole; FFAs: Free Fatty Acids; MitoRed: Mitotracker Red probe; WD:Western diet;

**Table S1: The related characteristics of liver tissue samples of human subjects without steatosis, with simple steatosis and with NASH**

| Clinical Features                    | No steatosis<br>n=24 | Simple steatosis<br>n=32 | NASH<br>n=54  |
|--------------------------------------|----------------------|--------------------------|---------------|
| Age (years)                          | 39.55±11.14          | 35.50 ±10.47             | 34.03 ± 9.08  |
| Gender                               |                      |                          |               |
| Male                                 | 10                   | 15                       | 28            |
| Female                               | 14                   | 17                       | 26            |
| Body mass index (kg/m <sup>2</sup> ) | 21.62±0.85           | 25.36±1.14               | 31.70±7.69    |
| Insulin (U/L)                        | 5.2 ± 2.5            | 23.20 ± 12.58            | 33.26 ± 19.65 |
| Triglycerides (mg/dL)                | 111.11±5.86          | 130.39±15.20             | 196.82±42.72  |
| ALT (U/L)                            | 33.26±7.39           | 67.37±9.02               | 100.16±24.09  |
| AST (U/L)                            | 18.81±1.82           | 32.74±8.99               | 86.32±25.51   |
| γ-GT (U/L)                           | 33.26±7.39           | 67.37±9.02               | 100.16±24.09  |
| Steatosis (%)                        |                      |                          |               |
| Grade 0                              | 24 (100%)            |                          |               |
| Grade 1                              |                      | 32 (100%)                |               |
| Grade 2                              |                      |                          | 28 (51.8%)    |
| Grade 3                              |                      |                          | 26 (48.2%)    |
| Ballooning (%)                       |                      |                          |               |
| Grade 0                              | 24 (100%)            |                          |               |

|                          |           |           |            |
|--------------------------|-----------|-----------|------------|
| Grade 1                  |           | 32 (100%) |            |
| Grade 2                  |           |           | 28 (51.8%) |
| Grade 3                  |           |           | 26 (48.2%) |
| Lobular inflammation (%) |           |           |            |
| Grade 0                  | 24 (100%) |           |            |
| Grade 1                  |           | 32 (100%) |            |
| Grade 2                  |           |           | 28 (51.8%) |
| Grade 3                  |           |           | 26 (48.2%) |

**Table S2**

| <b>Antibody</b>                       |                |                           |
|---------------------------------------|----------------|---------------------------|
| IKK $\alpha$                          | CST            | 2628S                     |
| Phospho-IKK $\alpha$                  | CST            | 2697S                     |
| IKK $\beta$                           | abcam          | ab55404                   |
| P65                                   | CST            | 8242S                     |
| Phospho-P65                           | CST            | 3033S                     |
| ikB $\alpha$                          | SANTA CRUZ     | SC-847                    |
| Phospho-ikB $\alpha$                  | SANTA CRUZ     | SC8404                    |
| PTPRO                                 | Proteintech    | 12161-1-AP                |
| NLRP3                                 | abcam          | ab214185                  |
| Caspase-1-P20                         | Proteintech    | 22915-1-AP                |
| Tomm20                                | CST            | 42406S                    |
| Tim23                                 | BD BIOSCIENCES | 611222                    |
| Cyto C                                | BD Biosciences | 556433                    |
| Atp5 $\beta$                          | SIGMA          | HPA001520                 |
| HSP60                                 | SIGMA          | SAB4501464                |
| P62                                   | abcam          | ab109012                  |
| LC3                                   | CST            | 4108S                     |
| $\beta$ -actin                        | Proteintech    | 66009                     |
| <b>Kit</b>                            |                |                           |
| Mouse IL-1 beta Platinum ELISA kit    |                | R&D Systems, MLB00C       |
| Mouse TNF $\alpha$ Platinum ELISA kit |                | R&D Systems, MTA00B       |
| Mouse IL-6 Platinum ELISA kit         |                | R&D Systems, M6000B       |
| Mouse IL-8 Platinum ELISA kit         |                | R&D Systems, D8000C       |
| Mouse IL-17 Platinum ELISA kit        |                | R&D Systems, M1700        |
| Mouse IL-18 Platinum ELISA kit        |                | R&D Systems, 7625         |
| Mitotracker Red Kit                   |                | M22425, Invitrogen, China |



|             |                                                 |
|-------------|-------------------------------------------------|
| MitoSOX Kit | M36008, Invitrogen, China                       |
| <b>Drug</b> |                                                 |
| CCCP        | #555-60-2; Sigma, Shanghai, China               |
| PA          | PA; Sigma, P0500-10G                            |
| OA          | Sigma, O1257                                    |
| PDTC        | Sigma, P8765                                    |
| Lien        | #P0943; Pureone Bio Technology, Shanghai, China |
| LPS         | Sigma, L6529                                    |

**Table S3**

| Gene           | Species | Forward Primer          | Reverse Primer          |
|----------------|---------|-------------------------|-------------------------|
| IL-1 $\beta$   | Mus     | GCAACTGTTCTGAACTCAACT   | ATCTTTTGGGGTCCGTCAACT   |
| TNF $\alpha$   | Mus     | CCCTCACACTCAGATCATCTTCT | GCTACGACGTGGGCTACAG     |
| IL-6           | Mus     | CCAAGAGGTGAGTGCTTCCC    | CTGTTGTTCCAGACTCTCTCCCT |
| IL-8           | Mus     | CAAGGCTGGTCCATGCTCC     | TGCTATCACTTCCTTTCTGTTGC |
| IL-17          | Mus     | TTTAACTCCCTTGCGCAAAA    | CTTCCCTCCGCATTGACAC     |
| IL18           | Mus     | CAAGGCTGGTCCATGCTCC     | TGCTATCACTTCCTTTCTGTTGC |
| MnSOD          | Mus     | CAGACCTGCCTTACGACTATGG  | CTCGGTGGCGTTGAGATTGTT   |
| FHC            | Mus     | CAAGTGCGCCAGAACTACCA    | GCCACATCATCTCGGTCAAAA   |
| Trx1           | Mus     | CATGCCGACCTTCCAGTTTTA   | TTTCCTTGTTAGCACCGGAGA   |
| Trx2           | Mus     | TGGGCTTCCCTCACCTCTAAG   | CCTGGACGTTAAAGGTCGTCA   |
| NQO1           | Mus     | AGGATGGGAGGTACTCGAATC   | AGGCGTCCTTCCTTATATGCTA  |
| HO-1           | Mus     | AAGCCGAGAATGCTGAGTTCA   | GCCGTGTAGATATGGTACAAGGA |
| Gpx1           | Mus     | AGTCCACCGTGTATGCCTTCT   | GAGACGCGACATTCTCAATGA   |
| XOR            | Mus     | CACTGGGCAGACGAACTCTAC   | TCTGGAATAGGCCATACCCAT   |
| iNOS           | Mus     | GTTCTCAGCCCAACAATACAAGA | GTGGACGGTTCGATGTCAC     |
| COX2           | Mus     | TGAGCAACTATTCCAAACCAGC  | GCACGTAGTCTTCGATCACTATC |
| CYP2E1         | Mus     | CGTTGCCTTGCTTGCTGGA     | AAGAAAGGAATTGGGAAAGGTCC |
| CYP2C11        | Mus     | GCGGCGTTCCTGAGTGTTTAT   | CTGGCAGGTGGTTACCGTT     |
| $\beta$ -actin | Mus     | GGCTGTATTCCCCTCCATCG    | CCAGTTGGTAACAATGCCATGT  |
| PTPRO          | Ho      | ACAAAACCTTGCCTGTAACC    | TTCCCCGAACTCCTCTTCTTT   |
| $\beta$ -actin | Ho      | CATGTACGTTGCTATCCAGGC   | CTCCTTAATGTCACGCACGAT   |

**Table S4: 16 weeks WD-induced NASH mice model characteristics**

|                                   | <i>Wild type</i> | <i>PTPROt KO</i> |
|-----------------------------------|------------------|------------------|
| Gender                            |                  |                  |
| Male                              | 6                | 6                |
| Body weight /g                    | 28.24 ± 1.21     | 36.41 ± 2.44     |
| Liver weight /g                   | 1.61 ± 0.04      | 1.81 ± 0.08      |
| TG (mmol/L)                       | 0.46 ± 0.01      | 0.50 ± 0.02      |
| TC (mmol/L)                       | 1.01 ± 0.04      | 1.30 ± 0.11      |
| ALT (U/L)                         | 47.72 ± 0.85     | 53.83 ± 1.83     |
| AST (U/L)                         | 194.76 ± 3.03    | 204.87 ± 2.71    |
| LDL(mmol/L)                       | 0.21 ± 0.01      | 0.26 ± 0.03      |
| HDL(mmol/L)                       | 0.89 ± 0.03      | 0.71 ± 0.07      |
| Fasting Blood<br>Glucose (mmol/L) | 10.76 ± 0.12     | 11.52 ± 0.24     |
| Insulin                           | 11.46 ± 0.26     | 13.31 ± 0.39     |
| Insulin Resistance<br>(AU)        | 5.06 ± 0.28      | 5.81 ± 0.17      |
| Ballooning (%)                    | 16.67 ± 2.58     | 67.50 ± 5.75     |
| Lipid<br>accumulation (%)         | 33.67 ± 4.50     | 68.00 ± 4.29     |

**Table S5: 4 weeks MCD-induced NASH mice model characteristics**

|                        | <i>Wild type</i> | <i>PTPROt KO</i> |
|------------------------|------------------|------------------|
| Gender                 |                  |                  |
| Male                   | 6                | 6                |
| Body weight /g         | 16.17 ± 1.01     | 13.67 ± 0.58     |
| Liver weight /g        | 0.62 ± 0.04      | 0.53 ± 0.01      |
| TG (mmol/L)            | 0.44 ± 0.02      | 0.57 ± 0.03      |
| TC (mmol/L)            | 0.93 ± 0.03      | 1.22 ± 0.05      |
| ALT (U/L)              | 46.00 ± 1.92     | 56.30 ± 2.94     |
| AST (U/L)              | 190.88 ± 6.14    | 214.85 ± 6.76    |
| LDL(mmol/L)            | 0.21 ± 0.03      | 0.30 ± 0.01      |
| HDL(mmol/L)            | 0.88 ± 0.04      | 0.71 ± 0.07      |
| Ballooning (%)         | 4.07 ± 0.98      | 17.45 ± 1.22     |
| Lipid accumulation (%) | 13.08 ± 1.64     | 34.42 ± 2.57     |
